# Supplementary material
Source: Springer Nature journal article supplement (https://www.springermedizin.de/resource/supplementary/12916_2012_599_MOESM2_ESM.pdf/9597958)

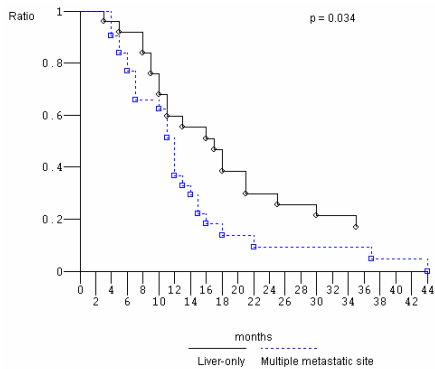

**(A1)**

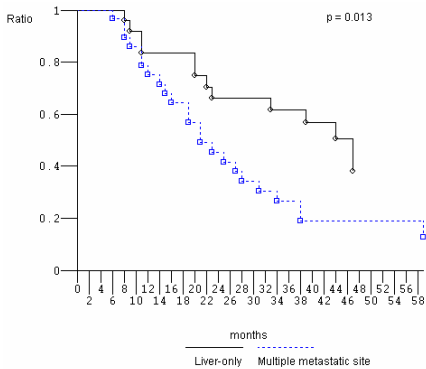

**(A2)**

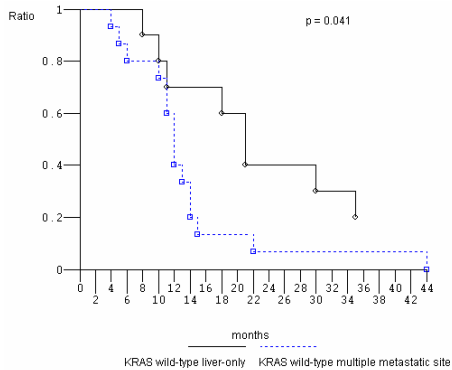

**(B1)**

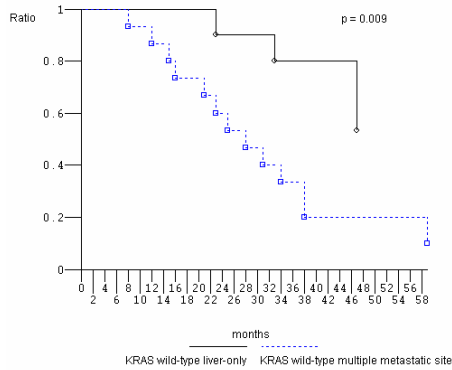

**(B2)**

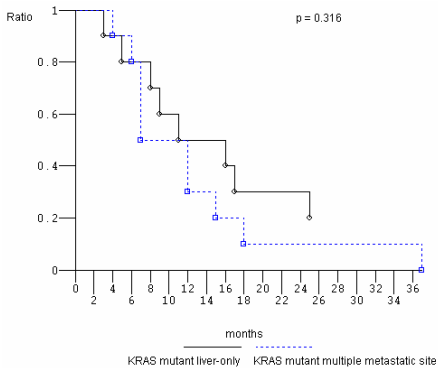

**(C1)**

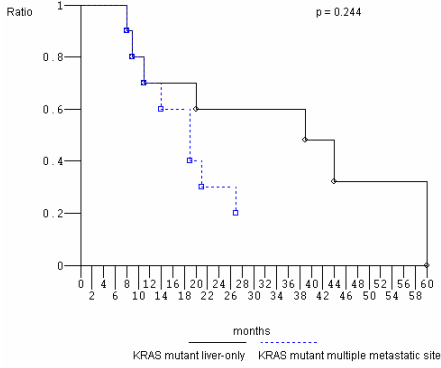

**(C2)**

Supplement: MOESM2 [file 9597958]
